1 **Rapid differentiation of regulatory CD4<sup>+</sup> T cells in the infarcted myocardium blunts in**  
2 **situ inflammation**

3 Murilo Delgobo<sup>1, 2</sup>, Emil Weiß<sup>1, 2</sup>, Diyaa EIDin Ashour,<sup>1, 2</sup> Lisa Popiolkowski<sup>1, 2</sup>, Panagiota  
4 Arampatzi<sup>3</sup>, Verena Stangl<sup>4</sup>, Paula Arias-Loza<sup>5</sup>, Peter P. Rainer<sup>4, 6</sup>, Antoine-Emmanuel Saliba<sup>7</sup>,  
5 Burkhard Ludewig<sup>8</sup>, Ulrich Hofmann<sup>1, 2</sup>, Stefan Frantz<sup>1, 2</sup>, and Gustavo Campos Ramos<sup>1, 2, §</sup>

6 1 Department of Internal Medicine I, University Hospital Würzburg, Würzburg, Germany

7 2 Comprehensive Heart Failure Center, University Hospital Würzburg, Würzburg, Germany

8 3 Core Unit Systems Medicine, University of Würzburg, Würzburg, Germany

9 4 Division of Cardiology, Department of Internal Medicine, Medical University of Graz, Graz,  
10 Austria

11 5 Department of Nuclear Medicine, University Hospital Würzburg, Würzburg, Germany.

12 6 BioTechMed Graz, Graz, Austria

13 7 Helmholtz Institute for RNA-based Infection Research, Helmholtz Centre for Infection  
14 Research, Würzburg, Germany

15 8 Institute of Immunobiology, Kantonsspital St. Gallen, St. Gallen, Switzerland

16

17 **Short title:** Deep phenotyping heart-specific Tregs

18

19 **§ Corresponding author:**

20 Dr. Gustavo Ramos

21 Immunocardiology Lab

22 University Hospital Würzburg

23 Am Schwarzenberg 15, Haus A15

24 D-97078 Würzburg, Germany

25 Phone: +49 931 201 46477

26 Fax: +49 931 201 46485

27 Email: Ramos\_G@ukw.de

28 Word count: 8625

29 The authors have declared that no conflict of interest exists.

30 **Abstract**

31 **Background:**

32 Myocardial infarction (MI) is a sterile inflammatory condition associated with tissue injury that  
33 results in the activation of T helper cell targeting cardiac antigens. However, the differentiation  
34 trajectories and *in situ* activity of heart-specific CD4<sup>+</sup>T cells activated in the MI context remain  
35 poorly understood.

36 **Methods:**

37 Herein, we combined T-cell receptor transgenic models targeting myocardial protein, single-  
38 cell transcriptomics, and functional phenotyping to elucidate how the myosin-specific CD4<sup>+</sup> T  
39 cells (TCR-M) differentiate in the murine infarcted myocardium and ultimately influence tissue  
40 repair. Furthermore, we adoptively transferred heart-specific T-cells that were pre-  
41 differentiated in vitro towards pro-inflammatory versus regulatory phenotypic states to dissect  
42 how they differentially regulate post-myocardial infarction (MI) inflammation.

43 **Results:**

44 Flow cytometry and single-cell transcriptomics findings revealed that transferred TCR-M cells  
45 rapidly acquired an induced regulatory phenotype (iTreg) in the infarcted myocardium and  
46 blunt local inflammation. Myocardial TCR-M cells differentiated into two main lineages enriched  
47 with cell activation and pro-fibrotic transcripts (e.g. *Tgfb1*) or with suppressor immune  
48 checkpoints (e.g. *Pdcd1*), which we also found in human myocardial tissue. These cells  
49 produced high levels of latency-associated peptide (LAP) and inhibited interleukine-17 (IL-17)  
50 responses. Notably, TCR-M cells that were pre-differentiated in vitro towards a regulatory  
51 phenotype maintained a stable in vivo FOXP3 expression and anti-inflammatory activity when  
52 adoptively transferred prior to MI induction. In contrast, TCR-M cells that were pre-  
53 differentiated in vitro towards a pro-inflammatory T<sub>H</sub>17 phenotype were partially converted  
54 towards a regulatory phenotype in the injured myocardium and blunted myocardial  
55 inflammation.

56 **Conclusions:**

57 These findings reveal that the myocardial milieu provides a suitable environment for iTreg  
58 differentiation and reveals novel mechanisms by which the healing myocardium shapes local  
59 immunological processes.

60 **Key words:** Myocardial infarction, T-cells, Tregs, Myocardial healing, Inflammation, Cardio-  
61 Immunology

62 **Introduction**

63 Research conducted over the past decade has positioned the immune system in the spotlight  
64 of cardiovascular biology, as immune phenomena mediate cardiac homeostatic functions and  
65 response to injury. Several immune cell types that contribute to electrical conduction,  
66 metabolism and tissue clearance in the healthy myocardium have been described<sup>1, 2</sup>. During  
67 a stressful condition such as myocardial infarction (MI), necrotic cell death propels the rapid  
68 release of damage associated molecular patterns and autoantigens, resulting in inflammatory  
69 responses molded to bring back cardiac homeostasis<sup>3</sup>. Such responses are characterized by  
70 an early influx of neutrophils, followed by monocyte recruitment and then T- and B cell  
71 migration<sup>1</sup>. However, uncontrolled long-lasting immune responses can lead to adverse cardiac  
72 remodeling and further deteriorate cardiac function<sup>1</sup>. Understanding the cell types and kinetics  
73 involved in both scenarios is therefore critical for designing new therapies and improving  
74 already existing ones and consequently promoting patient survival.

75 CD4<sup>+</sup> T-cell-mediated responses have been shown to directly affect tissue repair in a wide  
76 range of animals and tissues, including the myocardium<sup>4-6</sup>. Previous studies by our group and  
77 others demonstrated that CD4<sup>+</sup> T-cells, particularly Tregs expressing the transcription factor  
78 FOXP3, can foster myocardial healing<sup>3, 5</sup>. Increased T-cell signal was observed in heart-  
79 draining lymph nodes of infarcted patients and Tregs are present in cardiac biopsies<sup>7</sup>,  
80 suggesting those responses are conserved in humans<sup>8</sup>. Yet chronic T-cell activation has been  
81 shown to mediate detrimental remodeling during both pressure overload and aging<sup>2, 9</sup>. In  
82 addition, bystander T-cell activation during viral infection and immune checkpoint inhibitor  
83 treatment can lead to myocarditis<sup>10, 11</sup>. Defining CD4<sup>+</sup> T-cell responses in the injured  
84 myocardium is thus crucial for proper therapeutic intervention.

85 Our previous study revealed that transferred T-cells specific to a myosin heavy alpha chain-  
86 derived peptide (MYHCA<sub>614-629</sub>), henceforth termed TCR-M cells, acquired FOXP3 expression  
87 when they reached the infarcted myocardium, a phenomenon which was associated with  
88 improved cardiac repair<sup>7</sup>. Tregs can exhibit broad phenotypic plasticity, though influenced by  
89 TCR signaling, tissue milieu and cell ontogeny, meaning they can influence the infarcted heart  
90 by varied and still poorly understood mechanisms<sup>12</sup>.

91 Tregs present in injured skeletal muscle and lung can promote tissue repair via a mechanism  
92 that depends on amphiregulin secretion; this significantly differs from the canonical  
93 suppression seen in experimental models of autoimmunity<sup>13, 14</sup>. Under inflammatory  
94 conditions, Tregs may lose FOXP3 expression and acquire the pro-inflammatory phenotype  
95 characteristic of effector subsets. For instance, in the context of chronic ischemic heart failure,  
96 Bansal, et al. reported that Tregs acquire T<sub>H</sub>1 features and contribute to adverse left ventricular  
97 remodeling<sup>15</sup>. Fate mapping experiments conducted in the context of atherosclerosis also  
98 revealed that Tregs specific to apolipoprotein B lose their suppressive capacity and shift  
99 towards a T<sub>H</sub>1/T<sub>H</sub>17 phenotype as atherogenesis progresses<sup>16</sup>.

100 Considering the complex roles Tregs play in different disease models and stages<sup>17</sup>, we  
101 performed deep phenotyping of TCR-M cells that engage post-MI responses in order to  
102 functionally dissect how different T-helper cell states regulate myocardial repair. By combining  
103 adoptive cell transfer models using cardiac antigen-specific transgenic CD4<sup>+</sup> T-cells with  
104 single-cell transcriptomic and functional characterization, our analysis revealed a rapid  
105 differentiation of myosin-specific regulatory CD4<sup>+</sup> T cells in the infarcted myocardium, which  
106 then blunted in situ inflammation and preserved cardiac functionality. The myocardial induced  
107 Tregs exhibited two main transcriptional states, one enriched with effector/ pro-fibrotic  
108 transcripts and the other enriched with suppressor immune checkpoints, which we also found  
109 in human myocardial tissue. Moreover, adoptive cell transfer of TCR-M cells previously  
110 polarized towards regulatory vs. pro-inflammatory states revealed the differential contribution  
111 of each major T-cell subset to the regulation of myocardial inflammation.

## 112 **Methods**

### 113 *Data availability*

114 The full methods and supplemental figures are available in the Supplemental Material. The  
115 raw transcriptomic data acquired in this study will be available after the peer reviewed  
116 version is published.

### 117 *Mice*

118 Thy1.2 BALB/c mice were purchased from Charles River (Sulzfeld, Germany) and housed  
119 under specific pathogen-free conditions throughout the experiments. Thy1.1TCR-M mice  
120 expressing a transgenic TCR against MYHCA<sub>614-629</sub> peptide presented on I-A<sup>d</sup> (C.CB6-  
121 Tg(*Tcra*, *Tcrb*)<sup>562Biat</sup> were bred in our housing facility<sup>18</sup> and used as donors in adoptive T-cell  
122 transfer experiments. Thy1.2 DO11.10 mice expressing a transgenic TCR against  
123 Ovalbumin<sub>323-339</sub> were housed under specific pathogen-free conditions and bred in our housing  
124 facility. All mouse strains share the same genetic background (BALB/c).  
125

126

### 127 *Experimental models*

128 Magnetically sorted Thy1.1 TCR-M CD4<sup>+</sup> T-cells were adoptively transferred into Thy1.2 WT  
129 BALB/c and in DO11.10 mice (5 x10<sup>6</sup> cells > 90% purity, intraperitoneally injected) one day  
130 prior to induction of experimental myocardial infarction via permanent ligation of the left  
131 coronary artery. TCR-M cells found in the dissociated heart tissue, spleens and heart-draining  
132 mediastinal lymph nodes of infarcted recipients were immunophenotyped on days 5 and 7 after  
133 surgery by flow cytometry and single-cell RNA sequencing (see below). Echocardiography  
134 imaging of mice under slight isoflurane anesthesia (0.5-1.5%) was performed on day 5, as  
135 previously described <sup>19</sup>, to assess infarct sizes and cardiac function following cell transfer  
136 experiments. The echocardiography imaging analyses was conducted by an experimenter  
137 blinded to cohort details. Animals with infarct size smaller than 20% were considered technical  
138 failures and excluded from analyses <sup>20</sup>.

139

### 140 *Single-cell RNA sequencing*

141 Collagenase-digested hearts and mechanically dissociated mediastinal lymph nodes were  
142 processed and stained with different combinations of hashtag TotalSeqC antibodies and  
143 CD90.1 CiteSeq antibody (clone OX-7). Live lineage negative (CD11b, CD8a, B220) CD4<sup>+</sup> T-  
144 cells were sorted and combined as a single sample for library preparation using the 10x  
145 platform. Analysis was conducted using Seurat, scRepertoire and Monocle 3 R packages. A  
146 detailed description is found in Supplemental Materials.

147

### 148 *Statistical analyses*

149 The results are shown as the mean ± the standard error of the mean (SEM) along with the  
150 distribution of all individual values in each group. Sample sizes for each group are described  
151 in figure legends. Graphs and statistical analyses were performed with GraphPad Prism  
152 (version 7.0, GraphPad Software, San Diego, CA, USA). Unpaired two-tailed *t*-test was used  
153 to compare two groups with data following normal distribution. For multiple comparisons  
154 between more than two groups, one or two-way analyses of variance (ANOVA) were  
155 conducted followed by *post hoc* test. Differences were considered significant for P values  
156 below 0.05.

157

### 158 *Study approval*

159 The local authorities (Regierung von Unterfranken, Würzburg, Germany) approved all animal  
160 procedures and experiments were performed according to the Federation for Laboratory  
161 Animal Science Associations (FELASA) guidelines <sup>21</sup>. Left ventricular myocardial tissue was  
162 obtained from patients deceased after myocardial infarction that underwent autopsy. The use  
163 of human tissue is conformed with legal and institutional requirements and was approved by  
164 the ethics committee of the Medical University of Graz (31-288 ex 18/19).

165

## 166 **Results**

### 167 *Transferred heart-specific CD4<sup>+</sup> T-cells acquire a regulatory phenotype in the heart and* 168 *mediastinal lymph nodes*

169 MI leads to cardiomyocyte death and subsequent release of autoantigens that stimulate T-cell  
170 responses. We have previously identified a peptide fragment derived from the cardiac myosin  
171 heavy alpha chain (MYHCA<sub>614-629</sub>) as the dominant antigen triggering post-MI CD4<sup>+</sup> T-cell  
172 responses in BALB/c mice<sup>7</sup>. Adoptively transferred T-cells expressing a transgenic T-cell  
173 receptor specific for this myosin antigen (TCR-M) accumulated in the heart and acquired  
174 FOXP3 expression (**Figure 1A**). To determine whether local TCR activation is required for  
175 regulatory polarization in the heart, OVA-specific CD4<sup>+</sup> T-cells obtained from DO11.10 mice  
176 were either pre-stimulated *in vitro* with their cognate antigen (OVA<sub>323-339</sub>) or kept in resting  
177 condition before being transferred into DO11.10 recipients one day prior to MI induction. Pre-  
178 activated but not resting DO11.10 cells accumulated in the infarcted heart and over 60% of the

179 heart-infiltrating T helper cells expressed FOXP3, suggesting Treg conversion (**Figure 1B**).  
180 These findings indicate that TCR-dependent stimulation is required for T helper cells to  
181 infiltrate the injured heart<sup>22</sup> but dispensable for *in situ* Treg conversion.

182 To assess in greater depth how the MI milieu favors regulatory phenotype development in  
183 cardiac-specific CD4<sup>+</sup> T-cells, we performed single-cell RNA and T-cell receptor sequencing  
184 of endogenous CD4<sup>+</sup> T-cells (singlets, live, CD45<sup>+</sup>, Lin<sup>-</sup>, CD4<sup>+</sup>, Thy1.1<sup>-</sup>) and TCR-M cells  
185 (singlets, live, CD45<sup>+</sup>, Lin<sup>-</sup>, CD4<sup>+</sup> Thy1.1<sup>+</sup>) purified from hearts and mediastinal lymph nodes at  
186 5 and 7 days after MI (**Suppl. Figure 1A**). All sorted cell subsets and groups were multiplexed  
187 using barcoded hashtag antibodies (anti-CD45/MHC-I TotalSeqC) and sequenced as a single  
188 library preparation to avoid batch effects (**Suppl. Figure 1A**). In total, 13,940 CD4<sup>+</sup> single cells  
189 were analyzed and TCR-M cells were identified based on Thy1.1 Cite-seq signal in addition to  
190 TCR chain analysis, resulting in 1,565 TCR-M single cells (**Suppl. Figure 1A and 1B**). As  
191 illustrated in **Figure 1C**, our analyses revealed ten distinct clusters of cardiac and mediastinal  
192 lymph node T-cells, including *naïve* cells (expressing *Igfbp4*, *Il7r* and *Ccr7*), *bona fide* Tregs  
193 (expressing *Foxp3*, *Il2ra* and *Ctla4*) and effector T-cells (expressing *Tnfrsf9*, *Nr4a1* and  
194 *Cd69<sup>variable</sup>*), amongst others (**Figure 1C and Suppl. Figure 2A and 2B**). In addition, we  
195 identified a T-cell cluster, composed mainly of TCR-M cells, showing high expression of  
196 checkpoint inhibitor receptors (*Pdcd1*, *Cd200*, *Lag3*), regulatory markers (*Il2rb*, *Tgfb1*) and  
197 TCR activation genes (*Cd5*, *Nfatc1*) (**Figure 1C-1E and Suppl. Figure 2A, 2B**). We also  
198 identified five clusters of cells expressing type I interferon inducible genes, named *IFN\_I* (*Ifit1*,  
199 *Isg15*, *Irf7* and *Stat1*); *Lars2* and *Malat1* clusters expressing mitochondrial genes and some  
200 TNF-responsive genes, respectively; two minor clusters of cycling T-cells (*prolif.*) expressing  
201 cyclin genes and a set of transcripts suggesting recent thymic emigrants (*RTE*) (**Figure 1C**,  
202 **Suppl. Figure 2A**).

203 TCR-M cells showed high expression levels of *Izumo1r* but lacked *Igfbp4* (**Figure 1E**),  
204 consistent with a previously established Treg signature<sup>23</sup>. To further dissect the phenotype of  
205 TCR-M cells, we compiled a gene-set module score based on a RNA sequencing atlas<sup>24</sup>  
206 (**extended table 1**) of distinct polarized T-cell populations. As shown in **Figure 1E**, the TCR-  
207 M cells exhibited elevated expression of a transcriptomic signature compatible with “induced  
208 Tregs” (*iTregs*) phenotype<sup>24</sup>, such as *Cd200*, *Pou2f2* and *Sox4*. TCR-M cells showed  
209 negligible expression of transcripts related to T<sub>H</sub>17 subset signature (**Figure 1E**). Despite the  
210 clear induced Treg signature, no *Foxp3* expression among TCR-M cells was detected at the  
211 mRNA level (**Suppl. Figure 2B**). This finding is compatible with the low FOXP3 expression  
212 level observed at the protein level (**Suppl. Figure 2C**) and the low sequencing depth inherent  
213 to this technology. Integrating our results with another available dataset on polyclonal cardiac  
214 T-cells (without known antigen specificity)<sup>25</sup> further confirmed that the TCR-M cells clustered  
215 together with an independent cardiac Treg cluster, providing evidence for their regulatory  
216 phenotype (**Supplemental Figure 3A**).

217 Analyses of cell cluster distributions indicated that over 65% of TCR-M cells in the MedLN  
218 exhibited an *iTreg* signature, while the second most represented clusters were *naïve* (14%)  
219 and *effector* (10%) cells (**Figure 1F**). Cardiac TCR-Ms showed more heterogeneous  
220 distribution, with 40% clustering as *iTregs* and 20% as *effector* cells (**Figure 1F**). Taken  
221 together, the flow cytometry and scRNAseq analyses shown in **Figure 1A-1F** suggested that  
222 myosin-specific CD4<sup>+</sup> T-cells acquire an induced regulatory phenotype in the heart and  
223 MedLNs, a phenotype, which overlaps with endogenous *bona fide* Tregs, conventional effector  
224 cells and small pro-inflammatory cells.

225

226 *TCR-M cells activated in the context of MI present effector and suppressor phenotype*  
227 *signatures*



228 To understand TCR-M cells' transcriptomic signature in greater depth, we subset and re-  
229 clustered them for further analyses. We identified three main clusters in which TCR-M cells  
230 split, namely “*early/T<sub>CM</sub>*”, “*effector Tregs*” and “*suppressor*” (**Figure 2A**). The first cluster was  
231 comprised of cells exhibiting a mixed signature of early-activation transcripts and central  
232 memory phenotype, which largely overlap due to the similar circulation patterns exhibited by  
233 these two subsets (e.g. *Ccr7* and *Sell*)<sup>26</sup>. The cluster termed “*effector Tregs*” encompassed  
234 cells marked by the expression of canonical T-cell activation genes (*Nr4a1*, *Tnfrsf9*), the  
235 transcription factor *Myc* combined with high expression levels of *Tgfb1* and an induced Treg  
236 signature (**Figure 2B**). The “*suppressor*” cluster was defined by the expression of genes  
237 encoding immune inhibitory receptors, especially *Pdcd1* encoding PD-1, **Figure 2C and**  
238 **Suppl. Figure 4A and 4B**). Myocardial left ventricular tissue of a patient that had died upon  
239 myocardial infarction confirmed the accumulation of lymphocytes (CD3<sup>+</sup>) in the scar tissue,  
240 alongside with cells expressing PD-1<sup>+</sup> and TGF-β<sup>+</sup>, the two main transcripts observed in our  
241 sequencing analyses (**Figure 2D**).

242 To understand how TCR-M cells differentiate towards each state, we performed a *pseudotime*  
243 analysis, setting the *naïve1* cluster as an undifferentiated starting point (**Figure 2B, left panel**).  
244 Our analysis revealed that TCR-M cells reached an early activation state and then mainly  
245 branched into either *effector Tregs* (node 5) or *suppressor* (node 4) states (**Figure 2B**).  
246 Notably, as the TCR-M cells differentiated, they built up an *iTreg* signature (**Figure 2B, right**  
247 **panel, Suppl. Figure 4C**) which was retained in all activated states.

248 Next, we assessed the distribution of each TCR-M cluster in the MedLNs and hearts of sham-  
249 operated or infarcted mice. At day 5, TCR-Ms showing a *suppressor* phenotypic state were  
250 more frequent in the MedLNs of infarcted mice (20%) compared to sham controls (10%).  
251 Further, TCR-Ms found in infarcted hearts on day 5 mainly presented an *effector Treg*  
252 phenotype (40%) that was absent from sham-operated hearts, which mainly harbored TCR-M  
253 cells with a naïve phenotype (**Figure 2C**). On day 7 post MI, though, the TCR-M cells exhibited  
254 similar phenotypic distributions in the MedLNs and hearts of sham and infarcted mice (**Figure**  
255 **2C**). Taken together, these findings show that the infarcted myocardium positions TCR-M-cells  
256 in the injury site to acquire an *effector Treg* signature on day 5 post-injury. Moreover, that Treg  
257 conversion was also observed in sham-operated mice on day 7 post MI provides functional  
258 evidence that mechanisms of peripheral tolerance to cardiac antigens continuously operate  
259 during steady-state conditions, even in the absence of myocardial damage. These findings are  
260 particularly relevant for an autoantigen that is not expressed in the thymus and hence is not  
261 covered by central tolerance mechanisms<sup>27</sup>.

262 To further explore how MI shapes TCR-M cell differentiation, we analyzed the expression of  
263 key transcripts and effector molecules in T-cell biology. As shown in **Supplementary figure**  
264 **5A**, MedLN TCR-M cells purified from infarcted mice showed robust upregulation of genes  
265 associated with Treg fitness/suppressive function<sup>28, 29</sup> (e.g. *Ikzf2*, *Batf*), effector/memory  
266 responses (e.g. *Cd44*, *Tnfrsf9*)<sup>30</sup> and the cytokines *Tgfb1* and *Tnfsf8* at day 5 post MI (**Suppl.**  
267 **Figure 5A**). Myocardial TCR-M responses showed pronounced upregulation of effector  
268 molecules, the α4β1 integrin pair (*Itga4*, *Itgb1*) and downregulation of checkpoint inhibitors  
269 (*Cd96*, *Lag3*) (**Suppl. Figure 5B**). Day 7 MedLN responses were still characterized by a  
270 regulatory profile, but with downregulated effector molecules and higher expression of the  
271 cytokine *Il16*, which has been shown to mediate preferential Treg migration<sup>31</sup> (**Suppl. Figure**  
272 **5A**). Similarly, day 7 cardiac responses showed increased levels of regulatory and pro-healing  
273 genes (*Il10ra*, *Tgfb1*) and upregulation of checkpoint inhibitors (**Suppl. Figure 5B**). Altogether,  
274 our data indicate that, in infarcted recipients, TCR-M cells differentiate towards an effector  
275 regulatory T-cell phenotype, peaking on day 5 post MI, and then shift towards a  
276 suppressive/pro-resolution profile at day 7.

277

278 *TCR-M cells foster a pro-healing program in fibroblasts/macrophages*

279 We next sought to investigate how TCR-M-mediated responses occur in the heart and  
280 MedLNs, focusing on connections between cytokines, chemokines and receptors expressed  
281 by distinct TCR-M subsets and the respective receptors expressed by fibroblasts,  
282 macrophages and endothelial cells. To explore this, we integrated the transcripts up-regulated  
283 after MI in each of the TCR-M subsets defined in **Figure 2A** with a single-cell atlas consisting  
284 of several cell subsets purified from infarcted hearts 3 and 7 days post injury<sup>32</sup>. TCR-M cells  
285 exhibiting *early/T<sub>CM</sub>*, *effector Tregs* and *suppressor* phenotypes were taken as seeder cells,  
286 while fibroblasts, macrophages and endothelial cells were taken as receiver cells. Only  
287 transcripts up-regulated by the MI condition were considered in this approach. *NicheNet*  
288 analysis revealed synergistic pathways induced by *suppressor* and *effector Tregs* TCR-M  
289 cells. Transcripts enriched in *effector Tregs* TCR-Ms showed crosstalk to molecules in  
290 fibroblasts related to tissue repair processes, such as “response to wounding” and “collagen  
291 fibril organization” (**Figure 3A-B**). In macrophages, *suppressor* cells promoted pro-survival  
292 (*Pim1*) and immunoregulatory genes (*Arg1*, *Il1rn* and *Ptgs2*) via *Il4*, *Tnfsf11* and *Il21* signaling.  
293 In addition, *effector Tregs* stimulated pro-survival, inflammatory responses and a pro-healing  
294 phenotype via *Tgfb1* and, to a lesser extent, *Tnf* (**Figure 3C-D**). Analyzing TCR-M-derived  
295 ligands against receptors expressed on endothelial cells after MI revealed biological processes  
296 related to stress response and mesenchymal transition (**Figure 3E-F**).

297

#### 298 *TCR-M cells activated in the context of MI suppress pro-inflammatory T<sub>H</sub>17 responses*

299 To scrutinize the phenotype of myocardial T-cells at a functional level, we assessed the  
300 intracellular expression of prototypical T<sub>H</sub> cytokines produced by TCR-M and endogenous  
301 CD4<sup>+</sup> T-cells purified from infarcted hearts and spleen and re-stimulated *in vitro* (**Figure 4A**).  
302 We found that cardiac TCR-M cells preferentially expressed the latency associated peptide  
303 (LAP, a readout for TGF- $\beta$ 1 production), while showing low expression levels of pro-  
304 inflammatory mediators such as IFN- $\gamma$ , IL-17 and TNF in accordance to the scRNAseq analysis  
305 (**Figure 4B**). In WT infarcted mice that have not received adoptive transfer of TCR-M cells, the  
306 endogenous cardiac CD4<sup>+</sup> T-cell compartment was marked by a mixed expression of LAP and  
307 IL-17. However, the adoptive transfer of TCR-M cells suppressed the IL-17 production by the  
308 recipients' endogenous CD4<sup>+</sup> T-cells (**Figure 4B**). These findings provide a functional  
309 confirmation that TCR-M cells can suppress endogenous T-cell responses and T<sub>H</sub>17  
310 polarization in the infarcted heart, as suggested by the transcriptomic signatures. Importantly,  
311 TCR-M cells found in the spleens of infarcted mice neither show a LAP-expressing signature  
312 nor suppressed the activity of neighboring endogenous T-cells (**Figure 4C**). Interestingly, the  
313 endogenous cardiac CD4<sup>+</sup> T-cells of TCR-M transferred mice also showed a higher frequency  
314 of FOXP3<sup>+</sup>-expressing Tregs, in contrast to control mice (**Figure 4D**). No differences in the  
315 endogenous Treg numbers were found in the spleen, though (**Figure 4E**). These results  
316 illustrate that transferred TCR-M cells orchestrate local immune response by favoring Treg  
317 expansion/migration and inhibiting T<sub>H</sub>17 responses.

318

#### 319 *The infarcted myocardium steers T<sub>H</sub> polarized TCR-M cells towards regulatory T-cell* 320 *phenotype*

321 Herein, we report evidence that naive TCR-M cells acquire an iTreg signature poised with  
322 suppressive functions in the heart and MedLNs in the context of MI. Some conventional TCR-  
323 M cells remain in both sites, though, and the differential roles played by distinct TCR-M subsets  
324 with regard to post-MI repair remain unclear. Therefore, we pre-differentiated TCR-M cells  
325 towards T<sub>H</sub>1, T<sub>H</sub>17 or Treg phenotypes *in vitro* before transferring them into DO11.10  
326 recipients, one day before MI induction. We opted to use DO11.10 recipients in these  
327 experimental sessions to avoid clonal competition between transferred and endogenous cells.  
328 Successful enrichment of each T helper cell state of interest was confirmed prior to cell transfer

329 **(Figure 5A, ~80% T-bet<sup>+</sup> IFN- $\gamma$ <sup>var</sup> for T<sub>H</sub>1, ~90% ROR- $\gamma$ <sup>t</sup> IL-17<sup>var</sup> for T<sub>H</sub>17 and ~43%**  
330 **CD25<sup>+</sup>FOXP3<sup>+</sup> for Tregs).** Flow cytometry analysis revealed a stark accumulation of T<sub>H</sub>1-  
331 polarized TCR-M cells in the infarcted myocardium **(Figure 5B)**. The T<sub>H</sub>1-transferred cells  
332 found in the hearts of infarcted recipients largely retained the pro-inflammatory phenotypic  
333 signature (T-bet<sup>+</sup>) on day 5 post MI **(Figure 5B)**. The T<sub>H</sub>17-polarized TCR-Ms found in the  
334 infarcted hearts showed reduced ROR- $\gamma$ <sup>t</sup> expression compared to pre-transfer levels but still  
335 presented higher expression than the spleen counterparts **(Figure 5C)**. In contrast to T<sub>H</sub>1  
336 polarized group, 17.1 % ( $\pm$  4.4%) of T<sub>H</sub>17-polarized TCR-M cells found in the infarcted hearts  
337 acquired FOXP3 expression (in contrast to 2% pre-transfer levels). The splenic TCR-M cells  
338 retained their T<sub>H</sub>17 phenotype similar to pre-transfer levels, reinforcing the notion of myocardial  
339 conversion **(Figure 5C)**. In line with those observations, Treg-enriched TCR-M cells kept  
340 steady FOXP3 expression in all sites, at levels similar to those obtained pre-transfer **(Figure**  
341 **5D)**. We found no evidence that Tregs lose FOXP3 expression in the acutely injured  
342 myocardium. Altogether, these experiments provide functional evidence supporting the idea  
343 that the infarcted myocardium signals to myosin-specific T helper cells to shape their  
344 phenotypic plasticity towards a regulatory phenotype marked by FOXP3 expression.

345

346 *Dissecting the differential contribution of distinct TCR-M phenotypic states to post-MI*  
347 *responses*

348 Next, we sought to dissect how each distinct TCR-M phenotypic state can influence myocardial  
349 inflammatory response and cardiac function after MI. Along with the experimental groups  
350 reported in **Figure 5**, infarcted DO11.10 mice that did not receive adoptive T-cell transfer were  
351 used as controls. Post-MI responses were monitored by echocardiography and flow cytometry  
352 performed on day 5 after MI. Flow cytometry analysis of digested myocardial scars revealed  
353 that TCR-M T<sub>H</sub>1-transferred mice exhibit an increased recruitment of pro-inflammatory Ly6C<sup>hi</sup>  
354 monocytes **(Figure 6A)**, whereas adoptive transfer of TCR-M Tregs resulted in an overall  
355 decrease in myocardial leukocyte infiltrate **(Figure 6A)**. Gene expression analysis of pro-  
356 inflammatory transcripts (*Il1b* and *Tnf*) further confirmed that adoptive transfer of T<sub>H</sub>1 and T<sub>H</sub>17  
357 polarized TCR-M cells fueled cardiac inflammation, in contrast to Treg-transferred group that  
358 favored the expression of the cardiomyocyte-related transcript *Myh7* **(Figure 6B)**. These  
359 observations indicate that, despite being present at rather low frequencies in the injured  
360 myocardium, antigen-specific T-cells can shape the local inflammatory milieu, either fueling or  
361 suppressing *in situ* responses mirroring their phenotypic states.

362 Surprisingly, the adoptive transfer of T<sub>H</sub>17 TCR-M cells (and to a lesser extent of T<sub>H</sub>1 TCR-M  
363 cells) promoted an expansion of the recipients' endogenous FOXP3<sup>+</sup> Treg population **(Figure**  
364 **6C)**. These findings reveal complex crosstalk among different T-cell subsets in the healing  
365 myocardium. In light of these observations, we decided to explore a possible relationship  
366 between the fate of T<sub>H</sub>17-transferred cells and the *in situ* inflammatory response. As shown in  
367 **Figure 6D-E**, we found that the levels of myocardial leukocyte and myeloid cell numbers  
368 negatively correlated with the T<sub>H</sub>17-to-Treg conversion. Likewise, the myocardial inflammatory  
369 cell infiltration also negatively correlated with the TCR-M-induced expansion of the  
370 endogenous Treg compartment. Moreover, a lower Ly6C<sup>hi</sup> pro-inflammatory monocyte  
371 frequency correlated to higher endogenous Treg counts in this experimental group **(Figure**  
372 **6E)**. Taken together, these findings indicate that *in vivo* T<sub>H</sub>17-to-Treg conversion efficiently  
373 blocked myocardial inflammation similar to the effects observed for Tregs that had been pre-  
374 differentiated *in vitro* **(Figure 6F)**.

375 Echocardiography analysis performed on control and T<sub>H</sub>-transferred TCR-M mice, on day 5  
376 after MI, revealed that while TCR-M cells had no impact on infarct size or survival  
377 **(Supplementary table 1)**, Treg-transferred mice showed better-preserved end systolic and  
378 diastolic areas (ESA, EDA) **(Supplementary table 1)**. Mice transferred with T<sub>H</sub>17-polarised  
379 TCR-M cells also showed improved cardiac function **(Supplementary table 1)**, but it remains



380 unclear whether this is related to their partial Treg conversion or to other yet unknown  
381 mechanisms. These results demonstrate complex and dynamic crosstalk between different T  
382 helper cell subsets in the healing myocardium, which ultimately contributes to more effective  
383 tissue repair.

384

## 385 Discussion

386 In the present study, we performed deep phenotyping of antigen-specific post-MI responses  
387 and found that myosin-specific T helper cells develop an induced regulatory signature in the  
388 heart and MedLNs of infarcted mice, with cells mainly differentiating towards either an “*effector*  
389 *Treg*” or “*suppressor*” state, associated with fibrotic repair and local immune response  
390 regulation. Functional *in vivo* experiments performed using two different transgenic TCR  
391 models (MYHCA- and OVA-specific) and adoptive transfer of pre-differentiated TCR-M cells  
392 confirmed that the infarcted myocardial milieu directs the antigen-specific T helper cells to  
393 develop a regulatory phenotype and to suppress local inflammatory responses. Moreover, in  
394 contrast to other chronic myocardial diseases<sup>15, 16, 33</sup>, no evidence for loss of FOXP3 expression  
395 (i.e., ex-Treg) was observed in the acute phase of post-MI responses, further confirming that  
396 the cardio-immune crosstalk at this early stage favors salutary adaptive immune mechanisms.  
397 Finally, adoptive cell transfer experiments using TCR-M cells pre-differentiated towards  
398 defined phenotypic signatures revealed complex crosstalk, between conventional (FOXP3<sup>-</sup>)  
399 and regulatory (FOXP3<sup>+</sup>) cells in the infarcted milieu, that ultimately favored myocardial  
400 healing.

401 In a previous study, we identified a peptide from the cardiac myosin heavy alpha chain  
402 (MYHCA<sub>614-629</sub>) as a dominant myocardial antigen triggering cardioprotective CD4<sup>+</sup> T-cell  
403 responses in the MI context<sup>7</sup>, but the precise phenotype of these antigen-specific T-cells in  
404 post-MI responses has not been fully elucidated. When exposed to inflammatory conditions,  
405 FOXP3-expressing Tregs can exhibit an unstable phenotype and express pro-inflammatory  
406 cytokines<sup>34</sup>. For instance, Tregs have been shown to lose their suppressive function, acquire  
407 a T<sub>H</sub>1/T<sub>H</sub>17 phenotype and contribute to ischemic heart failure and atherosclerosis  
408 progression<sup>15, 16</sup>. We therefore combined deep phenotyping approaches (scRNA/ scTCRseq)  
409 with transgenic TCR models of adoptive cell transfer to scrutinize in detail how MI affects the  
410 antigen-specific T-cell differentiation.

411 Single-cell-level transcriptomic profiling of the myocardial-MedLN axis revealed ten CD4<sup>+</sup> T-  
412 cell clusters clearly distinguished from one another by conventional/regulatory phenotype and  
413 activation state. Interestingly, TCR-M cells showed a signature compatible with peripherally  
414 induced Tregs, marked by the expression of transcripts like *Izumo1r*, *Tgfb1*, *Cd200* and *Lag3*,  
415 among others<sup>23, 24</sup>. In addition, TCR-M cells lacked a gene expression signature, suggesting  
416 conventional T<sub>H</sub>17 polarization. A closer examination of the naive TCR-M cells activated during  
417 MI uncovered that they differentiate into an early activation state and then branch into either  
418 *effector Treg* or *suppressor* clusters. Notably, the inducible Treg signature developed  
419 alongside this differentiation trajectory. The *effector Treg* cells were predominant in infarcted  
420 hearts at day 5 and expressed high levels of transcription factor (TF) *Myc*<sup>35</sup>, antigen-specific  
421 stimulation markers (*Nr4a1* and *Tnfrsf9*), *Mif* (macrophage migration inhibitory factor) and  
422 *Tgfb1* (Transforming growth factor beta 1), which have been shown to influence early  
423 myocardial repair, cardiomyocyte metabolism, pro-fibrotic responses and immune  
424 responses<sup>36-40</sup>. In contrast, the *suppressor* TCR-M cells were characterized by the expression  
425 of several immune inhibitory receptors (e.g. *Pdcd1*, *Ctla4* and *Tigit*)<sup>41</sup>. This cluster also included  
426 a mixed gene expression signature compatible with follicular T helper cells (e.g. *Ii21*, *Cxcr5*  
427 and *Ii4*), but their potential impacts on myocardial antibody production were not addressed in  
428 this study. Functional adoptive transfer experiments confirmed the suppressor/regulatory  
429 phenotypes of transferred TCR-M cells.

430 Besides advancing our understanding of post-MI T-cell responses, single-cell-level  
431 transcriptomic profiling of heart-specific T-cells purified from sham-operated controls also  
432 sheds light on how peripheral mechanisms actively maintain immunological tolerance to  
433 cardiac antigens during steady-state conditions. Unlike most known autoantigens, the  
434 prototypical cardiac antigen MYHCA is not expressed in the thymus, where central  
435 mechanisms of dominant immunological tolerance take place<sup>42</sup>. It is therefore remarkable that  
436 even in the absence of myocardial injury, TCR-M cells still show signs of early activation and  
437 Treg conversion, though to a lesser extent than in the context of infarction. These observations  
438 reinforce that constitutive presentation of cardiac autoantigens occurs in the steady state<sup>43, 44</sup>  
439 and that immunological tolerance to myocardial antigens is actively maintained by peripheral  
440 mechanisms that remain poorly understood. That the healthy myocardium expresses higher  
441 baseline levels of several immune inhibitory receptors than most other tissues<sup>45</sup> may also  
442 contribute to peripheral tolerance mechanisms, though this requires further investigation. In a  
443 recent study, our co-authors reported that TCR-M cells can cross-react with a bacterial antigen  
444 encountered in the colonic environment, leading to the development of pathogenic heart-  
445 directed T<sub>H</sub>17 responses<sup>46</sup>. However, similar peptide mimicry mechanisms, which develop over  
446 the course of several weeks, are unlikely to play a role in the phenomena we observed during  
447 acute adoptive cell transfer experiments (days 5-7 post MI).

448 Though most of the TCR-M cells activated in the MI context acquire a Treg signature, infarcted  
449 hearts also contained conventional FOXP3<sup>-</sup> TCR-M cells. These distinct T-cell subsets' specific  
450 contributions to post-MI inflammation and repair have not yet been dissected. Unexpectedly,  
451 our findings revealed that adoptive transfer of conventional TCR-M cells primed toward a pro-  
452 inflammatory phenotype also expanded the recipients' endogenous Treg compartment,  
453 revealing complex cooperation mechanisms between these often-antagonistic states. The  
454 mechanisms underlying this bystander, T<sub>H</sub>1/T<sub>H</sub>17 induced rise in endogenous Tregs remain  
455 elusive. Still, it is plausible to assume that the IL-2 secreted by the transferred pre-activated  
456 TCR-M cells might contribute to this phenomenon, in parallel to the Treg expansion instigated  
457 by low IL-2 treatment<sup>47, 48</sup>.

458 Adoptive transfer of T<sub>H</sub>1-predifferentiated TCR-Ms led to increased inflammatory levels in the  
459 heart, whereas FOXP3<sup>+</sup> Tregs blunted the myocardial leukocyte infiltration. The Treg-mediated  
460 anti-inflammatory effects were seen both in animals that received Tregs pre-differentiated in  
461 vitro and in animals showing high T<sub>H</sub>17-to-Treg conversion in vivo. These findings confirm that  
462 antigen-specific T-cells help shape myocardial inflammatory responses and can regulate  
463 myocardial inflammatory responses despite being present at low frequencies only. These  
464 findings are in line with previous reports indicating myocardial Tregs have salutary effects in  
465 the context of MI<sup>3, 5, 7, 25, 49</sup>, though this is the first experimental evidence using Tregs with  
466 defined antigen specificity. Surprisingly, our data showed both T<sub>H</sub>17, and Treg TCR-Ms led to  
467 better-preserved EDA and ESA indices on day 5 post MI, when compared to no-transfer  
468 infarcted controls. However, it remains unclear whether the protection observed in the T<sub>H</sub>17  
469 transferred group is dependent on Treg conversion or on other unknown mechanisms. It is  
470 important to stress that post-MI inflammation is a Janus-faced mechanism and, while  
471 overshooting inflammation is obviously detrimental, effective *in situ* inflammation is also vital  
472 for proper healing and development of functional scar<sup>50, 51</sup>.

473 Taken together, in the present study we dissected how the myocardial milieu steers CD4<sup>+</sup> T-  
474 cell responses towards a regulatory phenotype through signaling molecules and cell activation  
475 states associated with effector and suppressor phenotypes. Our findings also provide  
476 functional evidence supporting salutary cardio-(auto)immune crosstalk during the acute phase  
477 of post-MI repair, maintained via mechanisms of peripheral immunological tolerance and  
478 complex cooperation between pro-inflammatory and regulatory T helper cells.

479

480 **Acknowledgements**

481 The authors greatly appreciate the skillful technical assistance of Elena Vogel and Andrea  
482 Leupold. They thank Dr. Max Rieckmann and Prof Encarnita Mariotti-Ferrandiz for the  
483 insightful comments and suggestions.

484

#### 485 **Author contributions**

486 VS and PPR analyzed the human myocardial tissue. LP performed mouse echocardiography  
487 measurements and analyses. MD, EW, LP, PA-L and GCR conducted experiments and  
488 analyzed data (FACS, cell sorting, immunophenotyping). PA and AES conducted the single-  
489 cell RNA sequencing experiments. MD, DEA and GCR analyzed the single cell RNA  
490 sequencing data. MD, EW, DEA, UH, SF and GCR made substantial contributions to the  
491 conception and design of the present work. BL generated and provided the TCR-M mice and  
492 contributed to data interpretation. All-coauthors contributed to the manuscript preparation.

#### 493 **Funding**

494 This work was supported by the Interdisciplinary Centre for Clinical Research Würzburg [E-  
495 354 to GCR], the European Research Area Network—Cardiovascular Diseases [ERANET-  
496 CVD JCT2018, AIR-MI Consortium grants 01KL1902 to G.C.R.] and I 4168-B to P.P.R. (via  
497 the Austrian Science Fund)] the German Research Foundation [DFG grant 411619907 to  
498 G.C.R. and 391580509 to U.H.] and the German Ministry of Research and Education [BMBF  
499 01EO1504 to A.E.S.]. E.W. received a scholarship from the Graduate School of Life Sciences  
500 – Würzburg. G.C.R., U.H, A.-E.S. and S.F. lead projects integrated in the Collaborative  
501 Research Centre "Cardio-Immune interfaces", funded by the German Research foundation  
502 (SFB1525 grant number 453989101). A.-E.S. and P.A. thank the Single Cell Center Würzburg  
503 for support.

504

#### 505 **Disclosures**

506 None.

507

#### 508 **References**

- 509 1. Swirski FK, Nahrendorf M. Cardioimmunology: The immune system in cardiac homeostasis and  
510 disease. *Nat Rev Immunol*. 2018;18:733-744
- 511 2. Ramos GC, van den Berg A, Nunes-Silva V, Weirather J, Peters L, Burkard M, Friedrich M,  
512 Pinnecker J, Abesser M, Heinze KG, Schuh K, Beyersdorf N, Kerkau T, Demengeot J, Frantz S,  
513 Hofmann U. Myocardial aging as a t-cell-mediated phenomenon. *Proc Natl Acad Sci U S A*.  
514 2017;114:E2420-E2429
- 515 3. Hofmann U, Beyersdorf N, Weirather J, Podolskaya A, Bauersachs J, Ertl G, Kerkau T, Frantz S.  
516 Activation of cd4+ t lymphocytes improves wound healing and survival after experimental  
517 myocardial infarction in mice. *Circulation*. 2012;125:1652-1663
- 518 4. D'Alessio FR, Kurzhagen JT, Rabb H. Reparative t lymphocytes in organ injury. *J Clin Invest*.  
519 2019;129:2608-2618
- 520 5. Weirather J, Hofmann UD, Beyersdorf N, Ramos GC, Vogel B, Frey A, Ertl G, Kerkau T, Frantz S.  
521 Foxp3+ cd4+ t cells improve healing after myocardial infarction by modulating  
522 monocyte/macrophage differentiation. *Circ Res*. 2014;115:55-67
- 523 6. Nosbaum A, Prevel N, Truong HA, Mehta P, Ettinger M, Scharschmidt TC, Ali NH, Pauli ML,  
524 Abbas AK, Rosenblum MD. Cutting edge: Regulatory t cells facilitate cutaneous wound healing.  
525 *J Immunol*. 2016;196:2010-2014

- 526 7. Rieckmann M, Delgobo M, Gaal C, Buchner L, Steinau P, Reshef D, Gil-Cruz C, Horst ENT, Kircher  
527 M, Reiter T, Heinze KG, Niessen HW, Krijnen PA, van der Laan AM, Piek JJ, Koch C, Wester HJ,  
528 Lapa C, Bauer WR, Ludewig B, Friedman N, Frantz S, Hofmann U, Ramos GC. Myocardial  
529 infarction triggers cardioprotective antigen-specific t helper cell responses. *J Clin Invest*.  
530 2019;129:4922-4936
- 531 8. Hammer A, Sulzgruber P, Koller L, Kazem N, Hofer F, Richter B, Blum S, Hulsmann M, Wojta J,  
532 Niessner A. The prognostic impact of circulating regulatory t lymphocytes on mortality in  
533 patients with ischemic heart failure with reduced ejection fraction. *Mediators Inflamm*.  
534 2020;2020:6079713
- 535 9. Nevers T, Salvador AM, Grodecki-Pena A, Knapp A, Velazquez F, Aronovitz M, Kapur NK, Karas  
536 RH, Blanton RM, Alcaide P. Left ventricular t-cell recruitment contributes to the pathogenesis  
537 of heart failure. *Circ Heart Fail*. 2015;8:776-787
- 538 10. Delgobo M, Frantz S. Heart failure in cancer: Role of checkpoint inhibitors. *Journal of Thoracic*  
539 *Disease*. 2018:S4323-S4334
- 540 11. Johnson DB, Balko JM, Compton ML, Chalkias S, Gorham J, Xu Y, Hicks M, Puzanov I, Alexander  
541 MR, Bloomer TL, Becker JR, Slosky DA, Phillips EJ, Pilkinton MA, Craig-Owens L, Kola N, Plautz  
542 G, Reshef DS, Deutsch JS, Deering RP, Olenchock BA, Lichtman AH, Roden DM, Seidman CE,  
543 Korolnik IJ, Seidman JG, Hoffman RD, Taube JM, Diaz LA, Jr., Anders RA, Sosman JA, Moslehi JJ.  
544 Fulminant myocarditis with combination immune checkpoint blockade. *N Engl J Med*.  
545 2016;375:1749-1755
- 546 12. Sakaguchi S, Vignali DA, Rudensky AY, Niec RE, Waldmann H. The plasticity and stability of  
547 regulatory t cells. *Nat Rev Immunol*. 2013;13:461-467
- 548 13. Burzyn D, Kuswanto W, Kolodin D, Shadrach JL, Cerletti M, Jang Y, Sefik E, Tan TG, Wagers AJ,  
549 Benoist C, Mathis D. A special population of regulatory t cells potentiates muscle repair. *Cell*.  
550 2013;155:1282-1295
- 551 14. Arpaia N, Green JA, Molledo B, Arvey A, Hemmers S, Yuan S, Treuting PM, Rudensky AY. A  
552 distinct function of regulatory t cells in tissue protection. *Cell*. 2015;162:1078-1089
- 553 15. Bansal SS, Ismahil MA, Goel M, Zhou G, Rokosh G, Hamid T, Prabhu SD. Dysfunctional and  
554 proinflammatory regulatory t-lymphocytes are essential for adverse cardiac remodeling in  
555 ischemic cardiomyopathy. *Circulation*. 2019;139:206-221
- 556 16. Wolf D, Gerhardt T, Winkels H, Michel NA, Pramod AB, Ghosheh Y, Brunel S, Buscher K, Miller  
557 J, McArdle S, Baas L, Kobiyama K, Vassallo M, Ehinger E, Dileepan T, Ali A, Schell M, Mikulski Z,  
558 Sidler D, Kimura T, Sheng X, Horstmann H, Hansen S, Mitre LS, Stachon P, Hilgendorf I, Gaddis  
559 DE, Hedrick C, Benedict CA, Peters B, Zirlik A, Sette A, Ley K. Pathogenic autoimmunity in  
560 atherosclerosis evolves from initially protective apolipoprotein b100-reactive cd4(+) t-  
561 regulatory cells. *Circulation*. 2020;142:1279-1293
- 562 17. Li J, Tan J, Martino MM, Lui KO. Regulatory t-cells: Potential regulator of tissue repair and  
563 regeneration. *Front Immunol*. 2018;9:585
- 564 18. Nindl V, Maier R, Ratering D, De Giuli R, Zust R, Thiel V, Scandella E, Di Padova F, Kopf M, Rudin  
565 M, Rulicke T, Ludewig B. Cooperation of th1 and th17 cells determines transition from  
566 autoimmune myocarditis to dilated cardiomyopathy. *Eur J Immunol*. 2012;42:2311-2321
- 567 19. Keppner L, Heinrichs M, Rieckmann M, Demengeot J, Frantz S, Hofmann U, Ramos G.  
568 Antibodies aggravate the development of ischemic heart failure. *Am J Physiol Heart Circ*  
569 *Physiol*. 2018;315:H1358-H1367
- 570 20. Lindsey ML, Bolli R, Canty JM, Jr., Du XJ, Frangogiannis NG, Frantz S, Gourdie RG, Holmes JW,  
571 Jones SP, Kloner RA, Lefer DJ, Liao R, Murphy E, Ping P, Przyklenk K, Recchia FA, Schwartz  
572 Longacre L, Ripplinger CM, Van Eyk JE, Heusch G. Guidelines for experimental models of  
573 myocardial ischemia and infarction. *Am J Physiol Heart Circ Physiol*. 2018;314:H812-H838
- 574 21. rodents Fwgorogfmo, rabbits, Mahler Convenor M, Berard M, Feinstein R, Gallagher A, Illgen-  
575 Wilcke B, Pritchett-Corning K, Raspa M. Felasa recommendations for the health monitoring of  
576 mouse, rat, hamster, guinea pig and rabbit colonies in breeding and experimental units. *Lab*  
577 *Anim*. 2014;48:178-192



- 578 22. Zarak-Crnkovic M, Kania G, Jazwa-Kusior A, Czepiel M, Wijnen WJ, Czyz J, Muller-Edenborn B,  
579 Vdovenko D, Lindner D, Gil-Cruz C, Bachmann M, Westermann D, Ludewig B, Distler O, Luscher  
580 TF, Klingel K, Eriksson U, Blyszczuk P. Heart non-specific effector cd4(+) t cells protect from  
581 postinflammatory fibrosis and cardiac dysfunction in experimental autoimmune myocarditis.  
582 *Basic Res Cardiol.* 2019;115:6
- 583 23. Zemmour D, Zilionis R, Kiner E, Klein AM, Mathis D, Benoist C. Single-cell gene expression  
584 reveals a landscape of regulatory t cell phenotypes shaped by the tcr. *Nat Immunol.*  
585 2018;19:291-301
- 586 24. Stubbington MJ, Mahata B, Svensson V, Deonaraine A, Nissen JK, Betz AG, Teichmann SA. An  
587 atlas of mouse cd4(+) t cell transcriptomes. *Biol Direct.* 2015;10:14
- 588 25. Xia N, Lu Y, Gu M, Li N, Liu M, Jiao J, Zhu Z, Li J, Li D, Tang T, Lv B, Nie S, Zhang M, Liao M, Liao  
589 Y, Yang X, Cheng X. A unique population of regulatory t cells in heart potentiates cardiac  
590 protection from myocardial infarction. *Circulation.* 2020;142:1956-1973
- 591 26. Cano-Gamez E, Soskic B, Roumeliotis TI, So E, Smyth DJ, Baldrighi M, Wille D, Nakic N, Esparza-  
592 Gordillo J, Larminie CGC, Bronson PG, Tough DF, Rowan WC, Choudhary JS, Trynka G. Single-  
593 cell transcriptomics identifies an effectorness gradient shaping the response of cd4(+) t cells  
594 to cytokines. *Nat Commun.* 2020;11:1801
- 595 27. Lv H, Havari E, Pinto S, Gottumukkala RV, Cornivelli L, Raddassi K, Matsui T, Rosenzweig A,  
596 Bronson RT, Smith R, Fletcher AL, Turley SJ, Wucherpfennig K, Kyewski B, Lipes MA. Impaired  
597 thymic tolerance to alpha-myosin directs autoimmunity to the heart in mice and humans. *J*  
598 *Clin Invest.* 2011;121:1561-1573
- 599 28. Kim HJ, Barnitz RA, Kreslavsky T, Brown FD, Moffett H, Lemieux ME, Kaygusuz Y, Meissner T,  
600 Holderried TA, Chan S, Kastner P, Haining WN, Cantor H. Stable inhibitory activity of regulatory  
601 t cells requires the transcription factor helios. *Science.* 2015;350:334-339
- 602 29. Xu C, Fu Y, Liu S, Trittipi J, Lu X, Qi R, Du H, Yan C, Zhang C, Wan J, Kaplan MH, Yang K. Batf  
603 regulates t regulatory cell functional specification and fitness of triglyceride metabolism in  
604 restraining allergic responses. *J Immunol.* 2021;206:2088-2100
- 605 30. Miragaia RJ, Gomes T, Chomka A, Jardine L, Riedel A, Hegazy AN, Whibley N, Tucci A, Chen X,  
606 Lindeman I, Emerton G, Krausgruber T, Shields J, Haniffa M, Powrie F, Teichmann SA. Single-  
607 cell transcriptomics of regulatory t cells reveals trajectories of tissue adaptation. *Immunity.*  
608 2019;50:493-504 e497
- 609 31. McFadden C, Morgan R, Rahangdale S, Green D, Yamasaki H, Center D, Cruikshank W.  
610 Preferential migration of t regulatory cells induced by il-16. *J Immunol.* 2007;179:6439-6445
- 611 32. Farbehi N, Patrick R, Dorison A, Xaymardan M, Janbandhu V, Wystub-Lis K, Ho JW, Nordon RE,  
612 Harvey RP. Single-cell expression profiling reveals dynamic flux of cardiac stromal, vascular and  
613 immune cells in health and injury. *Elife.* 2019;8
- 614 33. Bansal SS, Ismahil MA, Goel M, Patel B, Hamid T, Rokosh G, Prabhu SD. Activated t lymphocytes  
615 are essential drivers of pathological remodeling in ischemic heart failure. *Circ Heart Fail.*  
616 2017;10:e003688
- 617 34. Sharma A, Rudra D. Emerging functions of regulatory t cells in tissue homeostasis. *Front*  
618 *Immunol.* 2018;9:883
- 619 35. Saravia J, Zeng H, Dhungana Y, Bastardo Blanco D, Nguyen TM, Chapman NM, Wang Y,  
620 Kanneganti A, Liu S, Raynor JL, Vogel P, Neale G, Carmeliet P, Chi H. Homeostasis and  
621 transitional activation of regulatory t cells require c-myc. *Sci Adv.* 2020;6:eaaw6443
- 622 36. Miller EJ, Li J, Leng L, McDonald C, Atsumi T, Bucala R, Young LH. Macrophage migration  
623 inhibitory factor stimulates amp-activated protein kinase in the ischaemic heart. *Nature.*  
624 2008;451:578-582
- 625 37. Qi D, Atsina K, Qu L, Hu X, Wu X, Xu B, Piecychna M, Leng L, Fingerle-Rowson G, Zhang J, Bucala  
626 R, Young LH. The vestigial enzyme d-dopachrome tautomerase protects the heart against  
627 ischemic injury. *J Clin Invest.* 2014;124:3540-3550

- 628 38. Ikeuchi M, Tsutsui H, Shiomi T, Matsusaka H, Matsushima S, Wen J, Kubota T, Takeshita A.  
629 Inhibition of tgf-beta signaling exacerbates early cardiac dysfunction but prevents late  
630 remodeling after infarction. *Cardiovasc Res*. 2004;64:526-535
- 631 39. Kuwahara F, Kai H, Tokuda K, Kai M, Takeshita A, Egashira K, Imaizumi T. Transforming growth  
632 factor-beta function blocking prevents myocardial fibrosis and diastolic dysfunction in  
633 pressure-overloaded rats. *Circulation*. 2002;106:130-135
- 634 40. Sanjabi S, Oh SA, Li MO. Regulation of the immune response by tgf-beta: From conception to  
635 autoimmunity and infection. *Cold Spring Harb Perspect Biol*. 2017;9
- 636 41. Rumpret M, Drylewicz J, Ackermans LJE, Borghans JAM, Medzhitov R, Meyaard L. Functional  
637 categories of immune inhibitory receptors. *Nat Rev Immunol*. 2020;20:771-780
- 638 42. Coutinho A. The le douarin phenomenon: A shift in the paradigm of developmental self-  
639 tolerance. *Int J Dev Biol*. 2005;49:131-136
- 640 43. Smith SC, Allen PM. Expression of myosin-class ii major histocompatibility complexes in the  
641 normal myocardium occurs before induction of autoimmune myocarditis. *Proc Natl Acad Sci U*  
642 *S A*. 1992;89:9131-9135
- 643 44. Van der Borght K, Scott CL, Nindl V, Bouche A, Martens L, Sichien D, Van Moorlegheem J,  
644 Vanheerswyngheels M, De Prijck S, Saeys Y, Ludewig B, Gillebert T, Guillems M, Carmeliet P,  
645 Lambrecht BN. Myocardial infarction primes autoreactive t cells through activation of dendritic  
646 cells. *Cell Rep*. 2017;18:3005-3017
- 647 45. Ashour D, Delgobo M, Frantz S, Ramos GC. Coping with sterile inflammation: Between risk and  
648 necessity. *Cardiovasc Res*. 2021;117:e84-e87
- 649 46. Gil-Cruz C, Perez-Shibayama C, De Martin A, Ronchi F, van der Borght K, Niederer R, Onder L,  
650 Lutge M, Novkovic M, Nindl V, Ramos G, Arnoldini M, Slack EMC, Boivin-Jahns V, Jahns R, Wyss  
651 M, Mooser C, Lambrecht BN, Maeder MT, Rickli H, Flatz L, Eriksson U, Geuking MB, McCoy KD,  
652 Ludewig B. Microbiota-derived peptide mimics drive lethal inflammatory cardiomyopathy.  
653 *Science*. 2019;366:881-886
- 654 47. Klatzmann D, Abbas AK. The promise of low-dose interleukin-2 therapy for autoimmune and  
655 inflammatory diseases. *Nat Rev Immunol*. 2015;15:283-294
- 656 48. Zhao TX, Kostapanos M, Griffiths C, Arbon EL, Hubsch A, Kaloyirou F, Helmy J, Hoole SP, Rudd  
657 JHF, Wood G, Burling K, Bond S, Cheriyan J, Mallat Z. Low-dose interleukin-2 in patients with  
658 stable ischaemic heart disease and acute coronary syndromes (lilacs): Protocol and study  
659 rationale for a randomised, double-blind, placebo-controlled, phase i/ii clinical trial. *BMJ open*.  
660 2018;8:e022452
- 661 49. Saxena A, Dobaczewski M, Rai V, Haque Z, Chen W, Li N, Frangogiannis NG. Regulatory t cells  
662 are recruited in the infarcted mouse myocardium and may modulate fibroblast phenotype and  
663 function. *Am J Physiol Heart Circ Physiol*. 2014;307:H1233-1242
- 664 50. Frantz S, Hofmann U, Fraccarollo D, Schafer A, Kranepuhl S, Hagedorn I, Nieswandt B,  
665 Nahrendorf M, Wagner H, Bayer B, Pachel C, Schon MP, Kneitz S, Bobinger T, Weidemann F,  
666 Ertl G, Bauersachs J. Monocytes/macrophages prevent healing defects and left ventricular  
667 thrombus formation after myocardial infarction. *FASEB J*. 2013;27:871-881
- 668 51. Vagnozzi RJ, Maillet M, Sargent MA, Khalil H, Johansen AKZ, Schwanekamp JA, York AJ, Huang  
669 V, Nahrendorf M, Sadayappan S, Molkentin JD. An acute immune response underlies the  
670 benefit of cardiac stem cell therapy. *Nature*. 2020;577:405-409

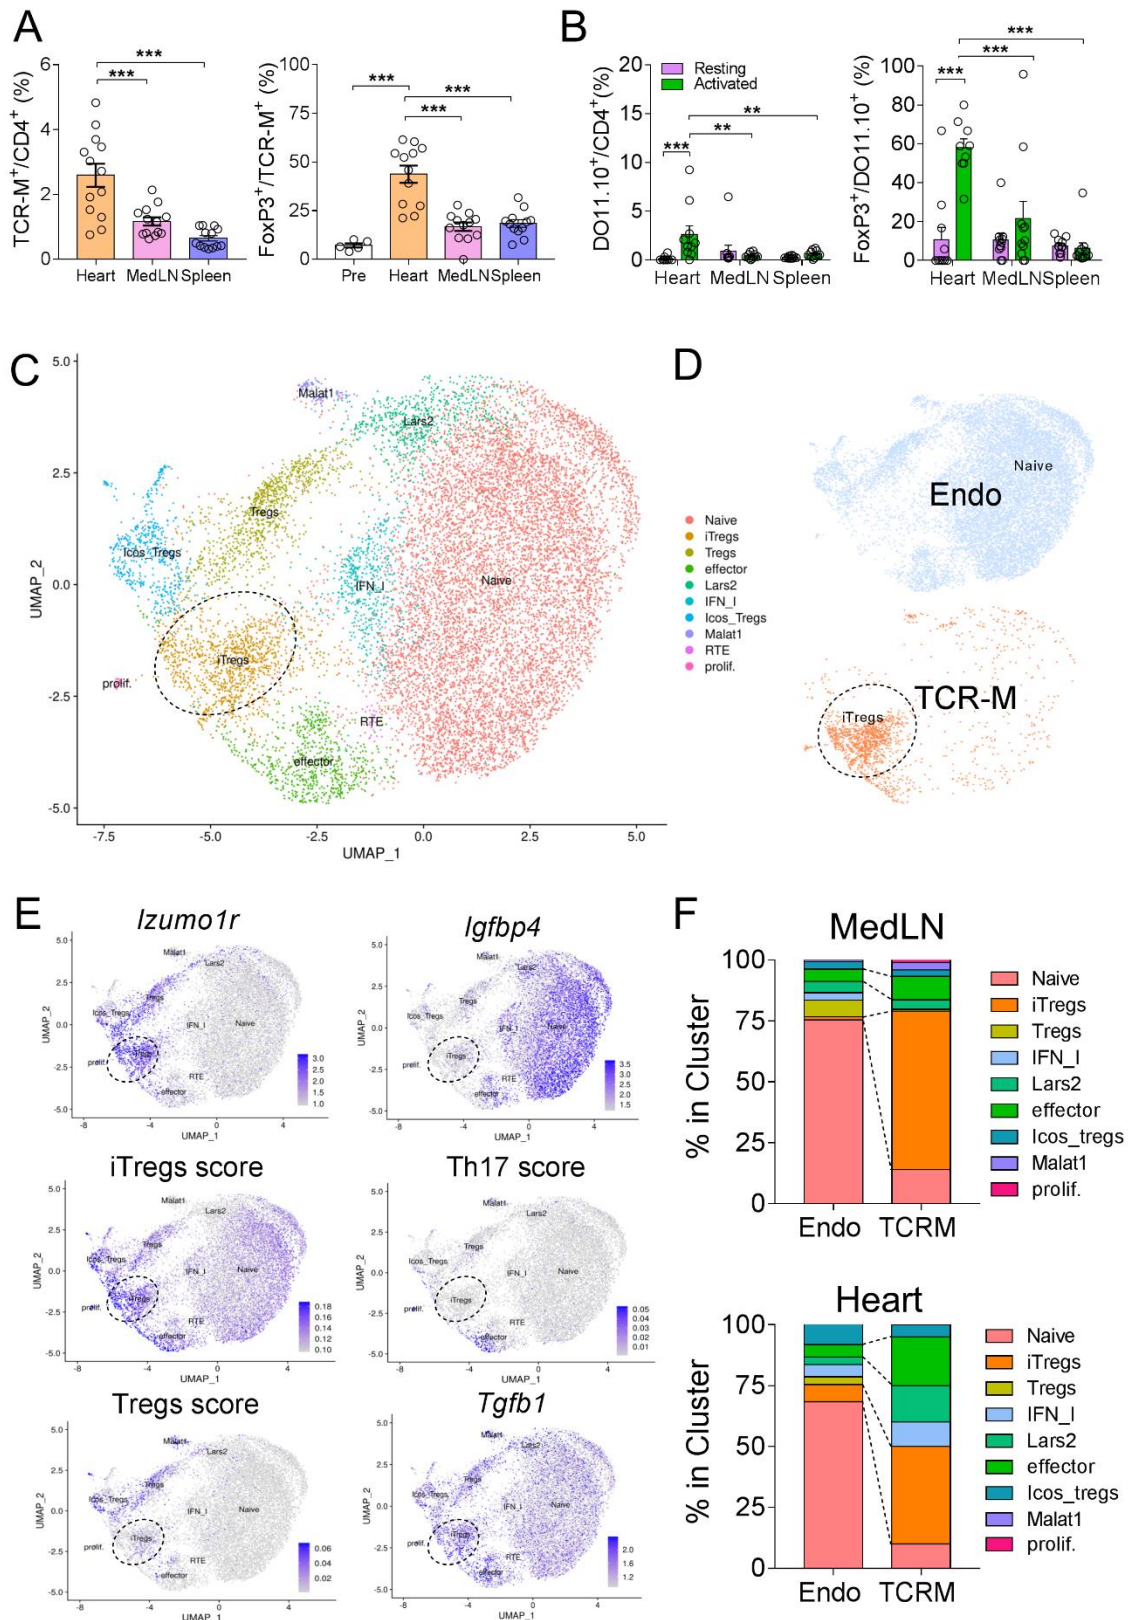

671

672 **Figure 1.** TCR-M cells shift towards an induced regulatory phenotype in the heart and  
 673 mediastinal lymph nodes. **(A)** TCR-M cell frequency among endogenous CD4<sup>+</sup> T-cells in heart,  
 674 MedLN and spleen 7d after MI (left panel). Frequency of cardiac, MedLN and spleen TCR-M  
 675 FOXP3<sup>+</sup> cells at 7d after MI (right panel). **(B)** Frequency of resting (violet) and pre-activated  
 676 (green) DO11.10 cells 5d after MI in DO11.10 recipients at different sites. Resting and pre-

677 activated DO11.10 FOXP3<sup>+</sup> cell distribution at different sites 5d after MI. **(C)** scRNA-seq  
678 analysis of total CD4<sup>+</sup> T-cells from heart and MedLN of sham-operated and infarcted mice, 5  
679 and 7d after surgery. UMAP representation of CD4<sup>+</sup> T-cells based on *k*-nearest neighbor (KNN)  
680 cell clusters, identified by prototypic transcript expression. **(D)** UMAP representation of  
681 endogenous (blue) and TCR-M (orange) cells according to CD90.1.TotalSeqC expression  
682 (positive in TCR-M cells). **(E)** *Featureplots* depict the combined expression of cluster-defying  
683 markers and prototypic T<sub>H</sub> gene sets in endogenous and TCR-M cells from Figure 1C. Dashed-  
684 line circles highlight the TCR-M cluster. **(F)** Cell numbers per scRNAseq clustering of  
685 endogenous and TCR-M cells in medLN (top) and heart (bottom) 5d after MI. Bars are color-  
686 coded according to Figure 1C and dashed lines indicate *iTreg* and effector cluster shifts for  
687 endogenous and TCR-M cells at each site. Panels **A-B** display the group mean values (bars);  
688 the error represents SEM and the circles the distribution of each individual value. Data were  
689 acquired from at least two independent experiments, n=5-12 mice. Statistical analysis in **A**:  
690 One-way ANOVA followed by Tukey's post-test. \*P < 0.05, \*\*P < 0.01 and \*\*\*P<0.001.  
691 Statistical analysis in panel **B**: 2-way ANOVA followed by Sidak's multiple comparisons test.



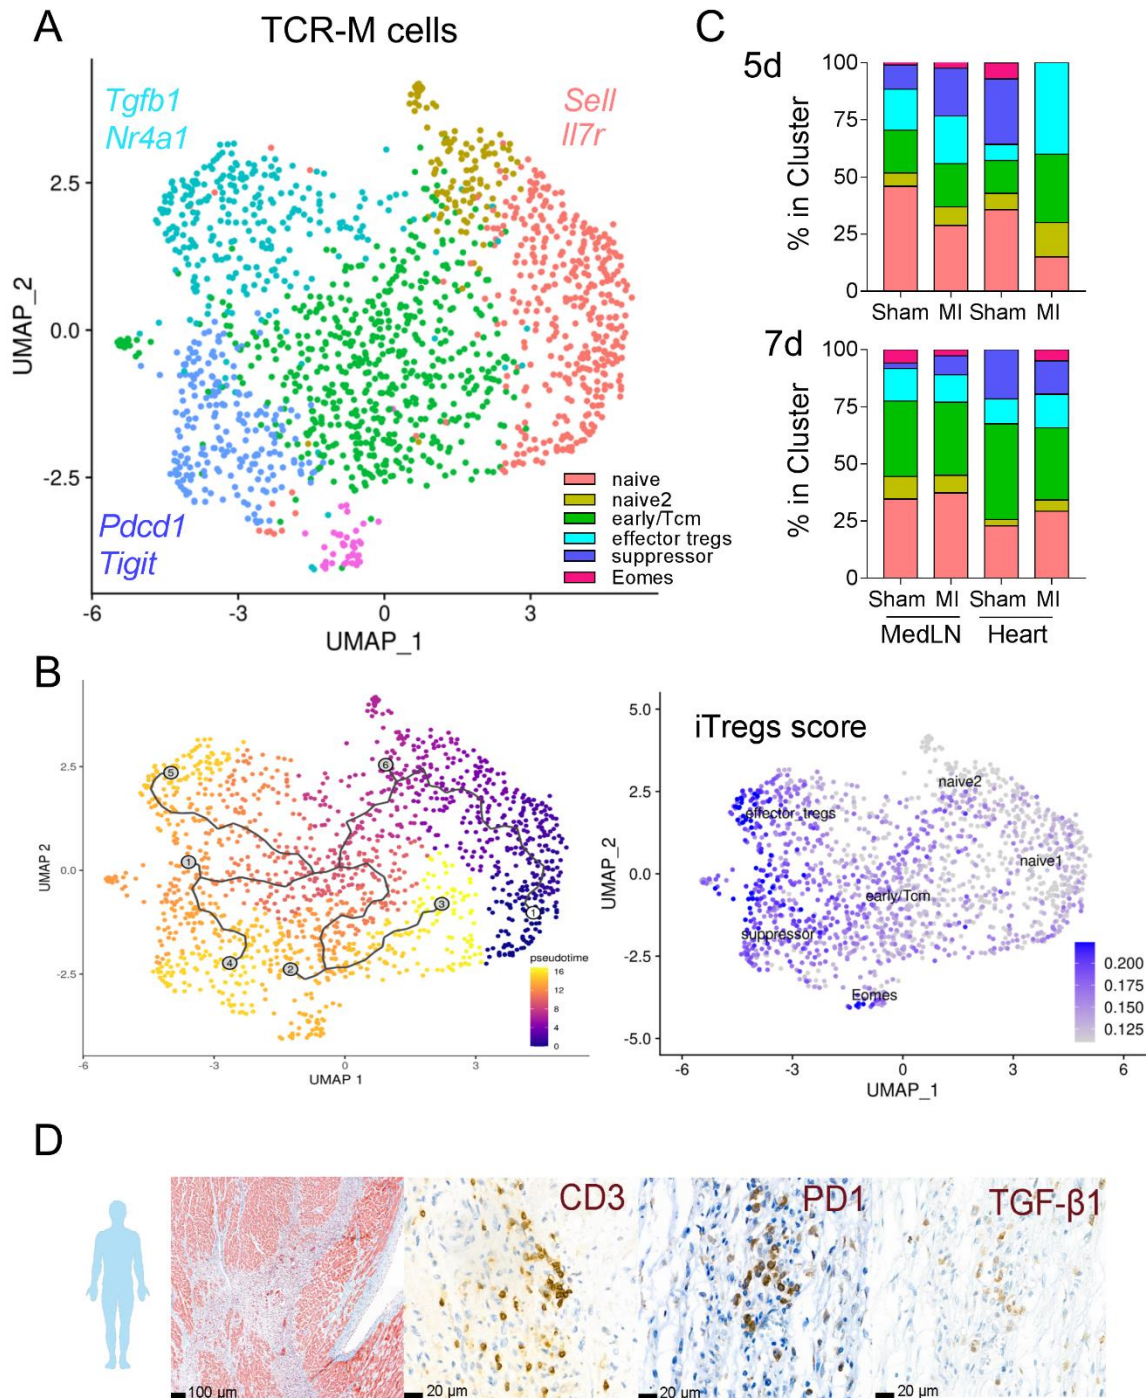

692

693 **Figure 2.** Phenotypic landscape of TCR-M cells in heart and MedLN of infarcted mice. **(A)**  
 694 UMAP representation and re-clustering restricted to TCR-M cells from Figure 1D. Colors depict  
 695 newly classified clusters based on prototypic gene signatures and most expressed transcripts.  
 696 **(B)** Pseudotime analysis (left panel) shows paths and degrees of differentiation. Cluster *naive1*  
 697 was set as starting condition. Numbered nodes represent differentiation states and scale  
 698 shows degree of differentiation. Featureplot illustrates combined *iTregs* signature scores for  
 699 different TCR-M clusters (bottom). **(C)** Cell numbers per scRNAseq clustering of distinct TCR-  
 700 M cell clusters from the MedLN and heart 5d (top) and 7d (bottom). Bars are color coded  
 701 according to Figure 2A. **(D)** Analyses of a post-MI human heart, including Masson's trichrome  
 702 staining and immunohistochemistry demonstrate interstitial fibrosis (blue), inflammation and  
 703 co-localization of T-cells (CD3), PD-1 and TGF- $\beta$ 1 in these areas.

704

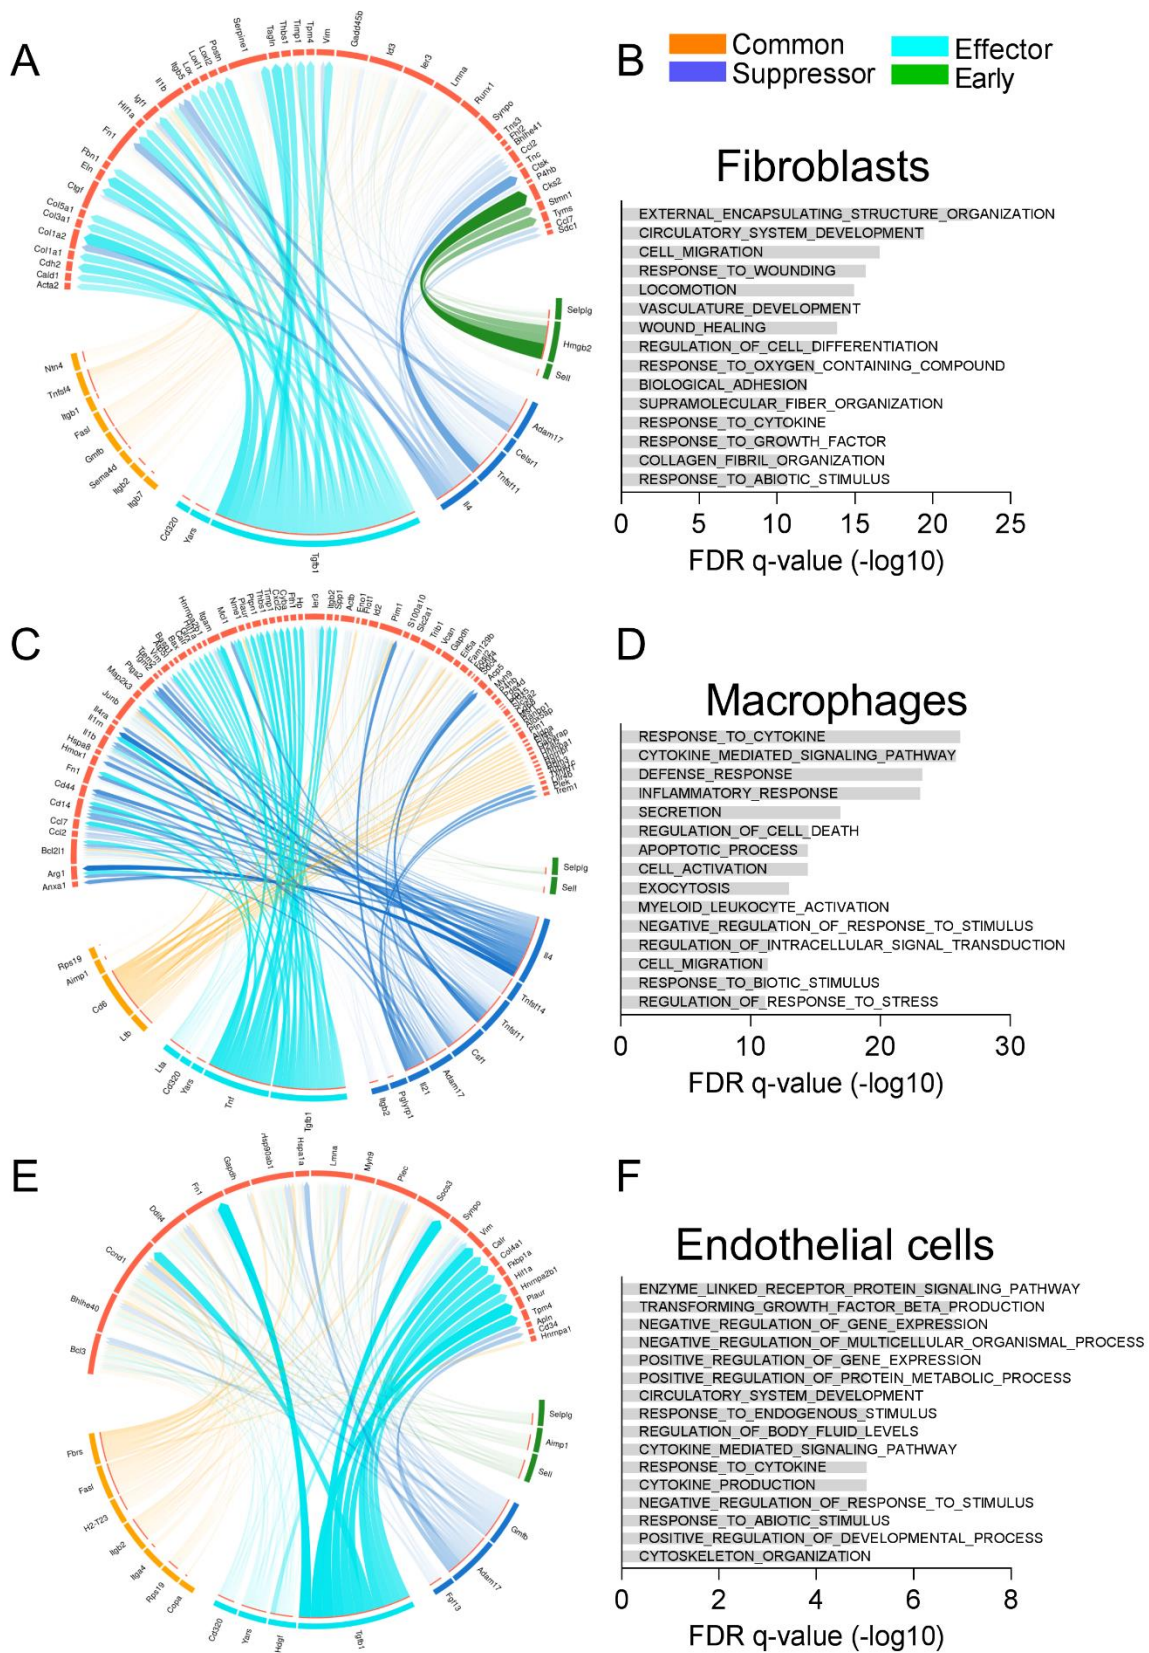

705

706 **Figure 3.** NicheNet analysis revealed synergistic pathways induced by TCR-M cells. **(A)** Circos  
707 plots illustrate fibroblast targets induced by TCR-M ligands per cell cluster. **(B)** Gene ontology  
708 analysis of transcripts induced in fibroblasts by TCR-M cells. **(C)** Circos plots show  
709 macrophage targets induced by TCR-M ligands and **(D)** gene ontology analysis of  
710 corresponding molecules. **(E)** Circos plots show TCR-M ligands and molecules induced in  
711 endothelial cells according to cell cluster (suppressor, effector, early or common mediator). **(F)**  
712 Gene ontology analysis of induced transcripts in endothelial cells. Panels **B**, **D** and **F** represent  
713 the top 15 gene ontology processes induced by TCR-M cells. The X-axes show the negative  
714 log<sub>10</sub> FDR value.



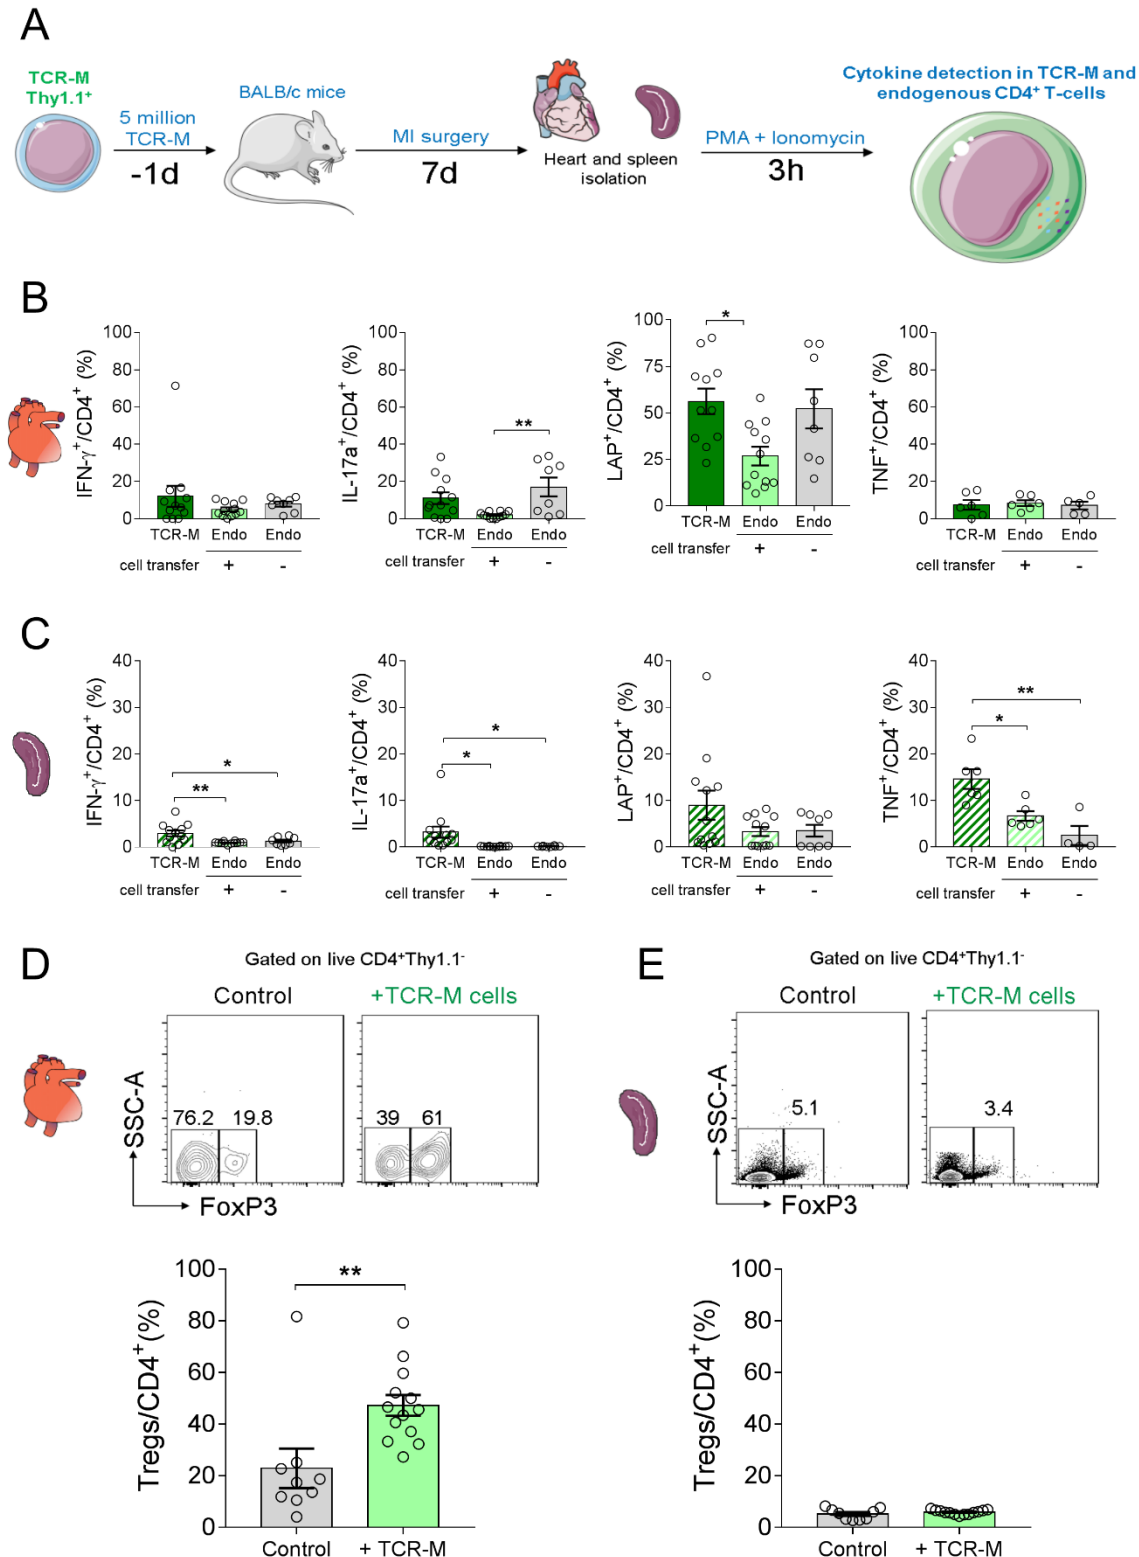

715

716 **Figure 4.** Cardiac TCR-M cells produce LAP and suppress IL-17 responses in endogenous  
 717 CD4<sup>+</sup> T-cells. **(A)** Experiment design: TCR-M cells were transferred to WT BALB/c mice  
 718 one day prior to MI surgery. Hearts and spleens were collect 7d post MI and cells were stimulated  
 719 for 3h with PMA/Ionomycin. Cytokine production was analyzed in TCR-M (CD4<sup>+</sup> CD90.1<sup>+</sup>) and  
 720 endogenous (CD4<sup>+</sup>CD90.1<sup>-</sup>) cells from TCR-M-transferred and control no-transfer mice. **(B)**  
 721 Frequency of cardiac CD4<sup>+</sup> IFN- $\gamma$ , IL-17, LAP and TNF-producing cells in TCR-M cells (dark



722 green), endogenous cells from TCR-M-transferred mice (light green) and endogenous cells  
723 from control no-transfer (grey) mice. **(C)** Corresponding intracellular cytokine analysis of  
724 spleens from TCR-M transferred and control no-transfer mice. **(D)** Endogenous CD4<sup>+</sup>FOXP3<sup>+</sup>  
725 Tregs frequency in the heart and spleen **(E)** of control no-transfer (gray) and TCR-M-  
726 transferred (light green) mice. Bars represent mean, error represents SEM and circles illustrate  
727 individual samples. Data were acquired from two independent experiments, n=8-12 mice.  
728 Statistical analyses in Panels **B** and **C**: One-way ANOVA followed by Tukey's post-test.  
729 \*P<0.05 and \*\*P<0.01. Statistics in **D** and **E**: Two-tailed unpaired T test. \*\*P<0.01.

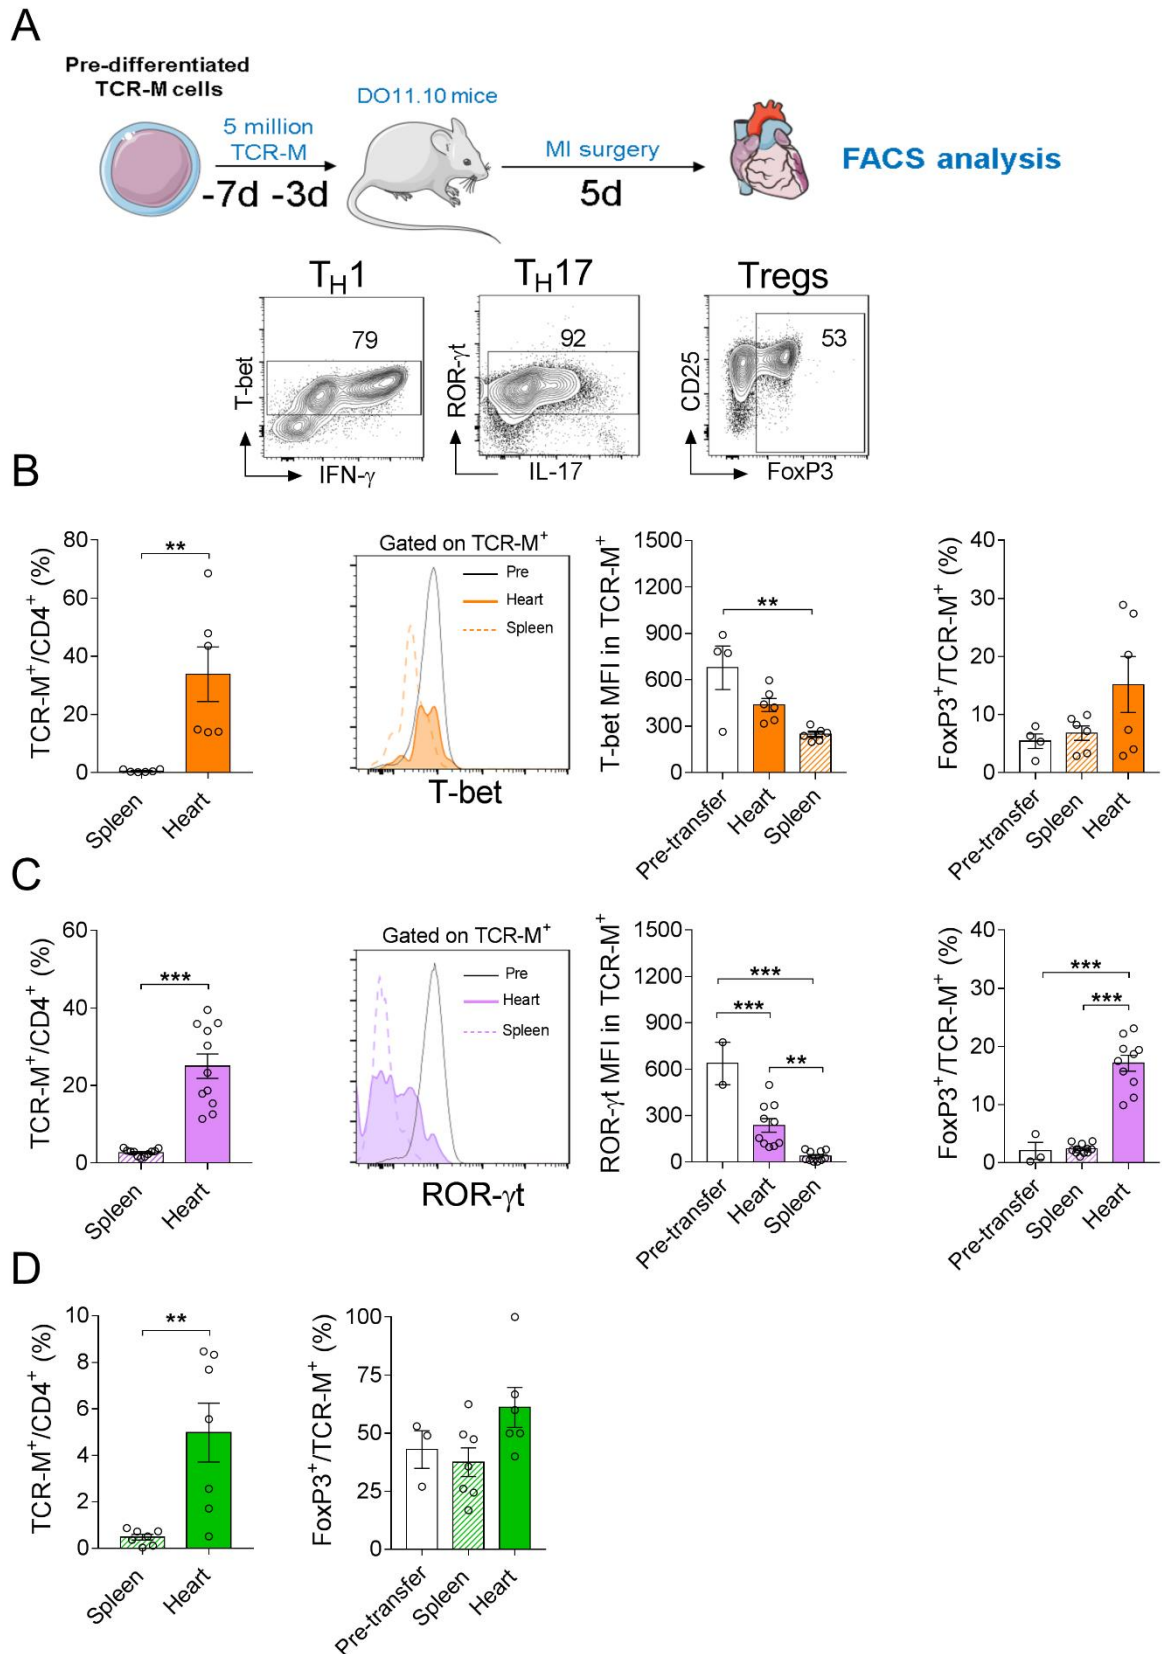

730

731 **Figure 5.** The infarcted myocardium steers polarized TCR-M cells towards a regulatory  
 732 phenotype. (A) TCR-M cells pre-differentiated towards  $T_H1$ ,  $T_H17$  and Tregs were inject into  
 733 DO11.10 hosts one day prior to MI surgery. FACS analysis of heart and spleen tissue was

734 performed 5 days post-MI. Contour-plots illustrate the expression of prototypic TFs and  
 735 cytokines for each polarization state at pre-transfer level. **(B)** Frequency of  $T_H1$  TCR-M cells  
 736 among  $CD4^+$  T-cells in the spleen and heart after MI. Overlaid histogram and graph depicts T-  
 737 bet expression in the transferred TCR-M cells found in spleens (dashed lines) and hearts (filled  
 738 histogram) of recipients. Open bars represent pre-transfer MFI. Frequency of FOXP3 $^+$  TCR-  
 739 M $^+$  cells in  $T_H1$  polarized cells at pre-transfer or analyzed in the heart and spleen tissue 5d  
 740 post-MI. **(C)** Frequency of  $T_H17$  TCR-M cells among heart and spleen  $CD4^+$  T-cells. Histogram  
 741 illustrates ROR- $\gamma$ t expression in  $T_H17$  polarized TCR-M cells from pre-transfer or heart and  
 742 spleen isolated cells. Frequency of FOXP3 $^+$   $T_H17$  TCR-Ms at pre-transfer or obtained from  
 743 spleen and heart at 5d post-MI. **(D)** Frequency of Treg polarized TCR-M cells among  $CD4^+$  T-  
 744 cells in the heart and spleen at 5d post-MI. Frequency of FOXP3 $^+$  in Treg polarized TCR-M  
 745 cells at pre-transfer or isolated from heart and spleen tissue. Bar graphs depict the mean, SEM  
 746 and the distribution of individual samples (4-11 mice per group). Statistical analysis in panels  
 747 **B, C and D left panel** Two-tailed unpaired T test. \*\*\* $P < 0.001$ . Statistical analysis in **B, C and**  
 748 **D right panel**: one-way ANOVA followed by Tukey's *post hoc*. \* $P < 0.05$ , \*\* $P < 0.01$  and  
 749 \*\*\* $P < 0.001$ .

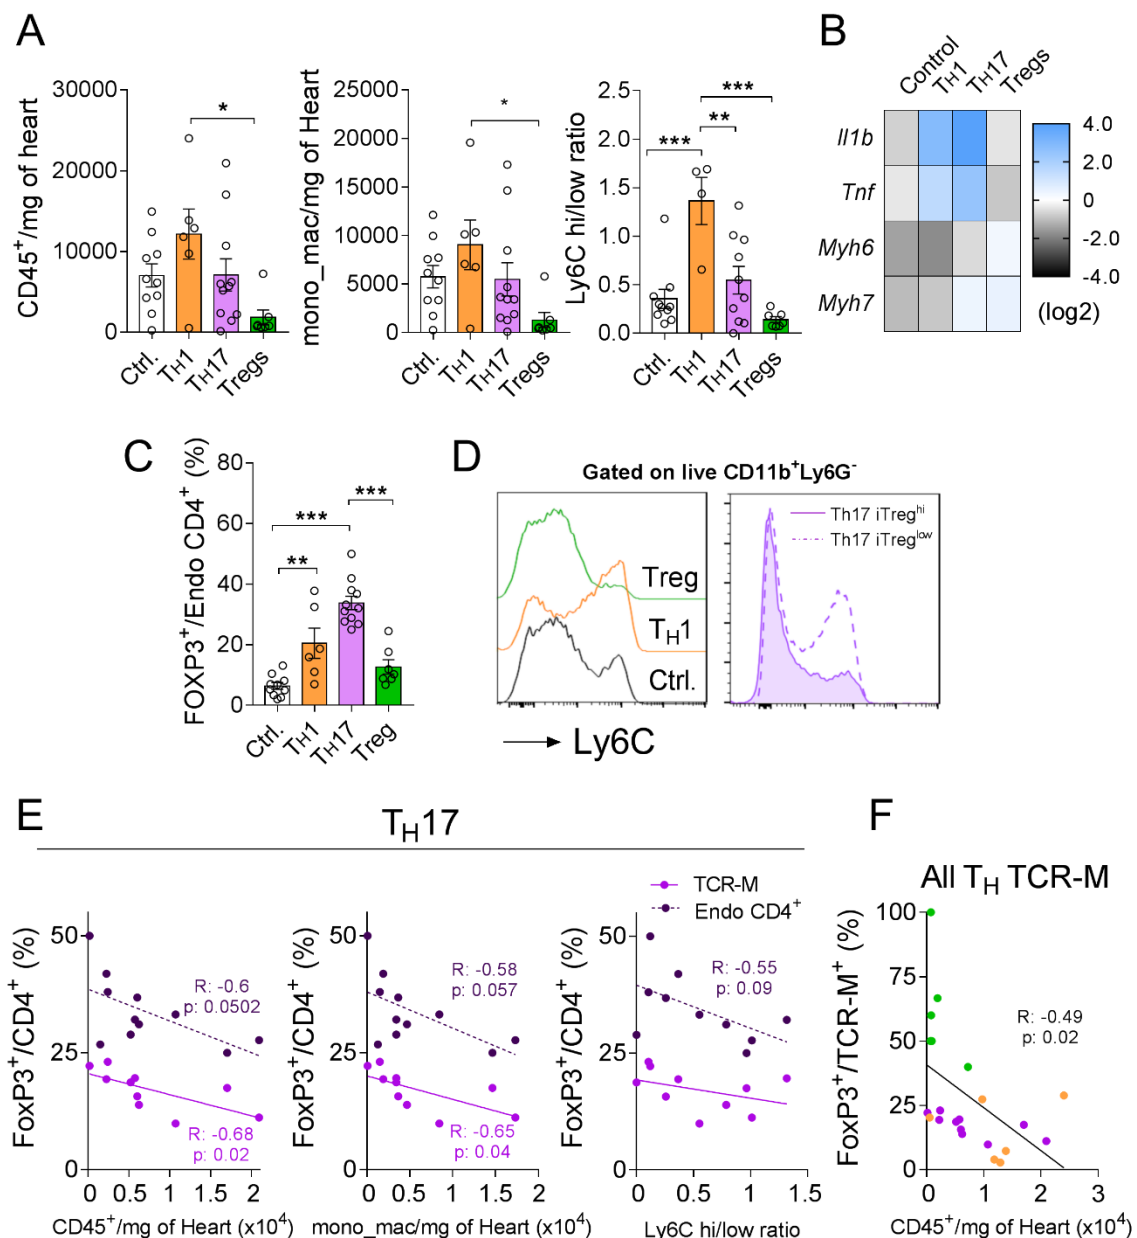

750

751 **Figure 6.** Differential regulation of myocardial infarction inflammation by TCR-M cells with  
752 distinct phenotypes. **(A)** Numbers of leukocytes, monocytes/macrophages; and ratio of  
753 Ly6Chi/Low monocytes in the hearts of T<sub>H</sub> TCR-M-transferred mice. **(B)** Normalized gene  
754 expression of pro-inflammatory and cardiomyocyte related transcripts in the heart of TCR-M  
755 T<sub>H</sub> transferred mice. **(C)** Frequency of endogenous cardiac Tregs in distinct TCR-M T<sub>H</sub>  
756 transferred mice. **(D)** Overlaid histogram (left panel) illustrates the frequency of Ly6C<sup>Hi</sup>  
757 monocytes in the heart of control (Ctrl.), T<sub>H</sub>1 and Treg transferred mice. Overlaid histogram  
758 (right panel) indicates the number of Ly6C<sup>Hi</sup> monocytes in T<sub>H</sub>17 transferred mice with high or  
759 low endogenous Treg numbers. **(E)** Correlation of induced TCR-M Tregs (light purple) and  
760 endogenous Tregs (dark purple) against heart CD45<sup>+</sup> counts, monocyte/macrophage counts  
761 and Ly6Chi/low ratio in T<sub>H</sub>17 transferred mice. **(F)** Correlation of induced TCR-M Tregs in T<sub>H</sub>1  
762 (orange), T<sub>H</sub>17 (purple) and Treg (green) transferred mice against respective heart CD45<sup>+</sup>  
763 counts. Bars represent mean, error represents SEM and symbols illustrate individual samples.  
764 N=6-11 mice per group. Open bars represent no TCR-M-transferred control mice. Statistical  
765 analysis in **A**: one-way ANOVA followed by Tukey's *post hoc*. \*P<0.05, \*\*P<0.01, \*\*\*P<0.001.  
766 Statistical analysis in **E** and **F**: Pearson correlation, respective R and p values are indicated in  
767 the figure.

768

769

770

771
